# Supplementary material for: Comparison of the electrochemical properties of yolk–shell and dense structured CoFe2O4powders prepared by a spray pyrolysis process
Source: Royal Society of Chemistry journal article supplement (doi:10.1039/c4ra05789a), 2014-08-18
Supplement: c4ra05789a1.pdf [file c4ra05789a1.pdf]

## *Supporting Information*

### **Comparison of the electrochemical properties of yolk-shell and dense structured $\text{CoFe}_2\text{O}_4$ powders prepared by spray pyrolysis process**

You Na Ko,<sup>a</sup> Seung Bin Park,<sup>b</sup> Jong-Heun Lee<sup>a</sup> and Yun Chan Kang<sup>\*a</sup>

<sup>a</sup> Department of Materials Science and Engineering, Korea University, Anam-Dong, Seongbuk-Gu, Seoul 136-713, Korea. E-mail: yckang@korea.ac.kr; Fax: +82-2-928-3584; Tel: +82-2-3290-3268

<sup>b</sup> Department of Chemical and Biomolecular Engineering, Korea Advanced Institute of Science and Technology, 291 Daehak-ro, Yuseong-gu, Daejeon 305-701, Korea

## **EXPERIMENTAL DETAILS**

### **Fabrication of yolk-shell and dense CoFe<sub>2</sub>O<sub>4</sub> powders**

In this study, yolk-shell and dense CoFe<sub>2</sub>O<sub>4</sub> powders were fabricated by a one-pot spray pyrolysis process. In the spray pyrolysis system, droplets were generated using a 1.7-MHz ultrasonic spray generator consisting of six vibrators. The droplets were carried to a quartz reactor of length 1200 mm and diameter 50 mm, using air as carrier gas at a flow rate of 10 L min<sup>-1</sup>. Reactor temperature was maintained at 900°C. The aqueous spray solution was prepared by dissolving cobalt acetate tetrahydrate and iron nitrate nonahydrate. Total concentration of Co and Fe components dissolved in distilled water was 0.2 M. Sucrose concentration was fixed at 0.7 M for fabrication of yolk-shell-structured CoFe<sub>2</sub>O<sub>4</sub> powders.

### **Characterizations**

Morphology of the CoFe<sub>2</sub>O<sub>4</sub> powders fabricated by spray pyrolysis was observed by scanning electron microscope (SEM), (JEOL JSM-6060), and transmission electron microscope (FE-TEM), (JEOL JEM-2100F). Crystal structures of the prepared powders were investigated by X-ray diffraction (XRD), (X'Pert PRO MPD) using Cu K $\alpha$  radiation ( $\lambda = 1.5418 \text{ \AA}$ ) at the Korea Basic Science Institute (Daegu). The amount of carbon in the powders was determined using thermal gravimetric analysis (TGA), (SDT Q600). Specific surface area of the powders was measured by the Brunauer-Emmett-Teller (BET) method using N<sub>2</sub> as the adsorbate gas.

### **Electrochemical measurements**

Electrochemical properties of the prepared powders were analyzed by fabricating a 2032-type coin cell. The anode was prepared from a mixture of the active material, carbon black, and sodium carboxymethyl cellulose (CMC) in a weight ratio of 7:2:1. Li metal and microporous polypropylene film were used as counter electrode and separator, respectively. The

electrolyte was composed of 1 M  $\text{LiPF}_6$  dissolved in a mixture of fluoroethylene carbonate/dimethyl carbonate (FEC/DMC; 1:1 v/v). Discharge/charge characteristics of the samples were investigated by cycling in the voltage range of 0.001–3 V at various current densities. Cyclic voltammograms (CVs) were measured at a scan rate of  $0.1 \text{ mV s}^{-1}$ .

| <b>Table. S1</b> Electrochemical properties of CoFe <sub>2</sub> O <sub>4</sub> materials prepared by various processes. |                         |                                                                    |                          |                                            |              |           |
|--------------------------------------------------------------------------------------------------------------------------|-------------------------|--------------------------------------------------------------------|--------------------------|--------------------------------------------|--------------|-----------|
| Electrode                                                                                                                | Current rate            | Initial C <sub>dis</sub> /C <sub>cha</sub> [mA h g <sup>-1</sup> ] | Coulombic Efficiency [%] | Discharge capacity [mA h g <sup>-1</sup> ] | Cycle number | Ref       |
| three-dimensional ordered macroporous CoFe <sub>2</sub> O <sub>4</sub>                                                   | 0.2 mA cm <sup>-2</sup> | 1782/~1150                                                         | 65                       | 702                                        | 30           | [25]      |
| CoFe <sub>2</sub> O <sub>4</sub> nanorod                                                                                 | 1000 mA g <sup>-1</sup> | 1694/1298                                                          | 77                       | 800                                        | 300          | [26]      |
| hollow CoFe <sub>2</sub> O <sub>4</sub> nanosphere                                                                       | 90 mA g <sup>-1</sup>   | 2264/~1250                                                         | ~55                      | 1185                                       | 50           | [29]      |
| CoFe <sub>2</sub> O <sub>4</sub> /C composite fiber                                                                      | 2 C                     | 1004/-                                                             | -                        | 494                                        | 700          | [14]      |
| mesoporous CoFe <sub>2</sub> O <sub>4</sub> nanosphere/CNT                                                               | 200 mA g <sup>-1</sup>  | 1517.4/1123.6                                                      | 74                       | 1045.6                                     | 100          | [27]      |
| wintersweet-flower like CoFe <sub>2</sub> O <sub>4</sub> /MWCNTs                                                         | 45 mA g <sup>-1</sup>   | 1016/740                                                           | 73                       | 823                                        | 50           | [28]      |
| CoFe <sub>2</sub> O <sub>4</sub> /graphene sandwich                                                                      | 800 mA g <sup>-1</sup>  | -/735                                                              | -                        | 565                                        | 300          | [13]      |
| CoFe <sub>2</sub> O <sub>4</sub> /graphene nanocomposite                                                                 | 100 mA g <sup>-1</sup>  | 1388/906                                                           | 65                       | 910                                        | 50           | [30]      |
| carbon-encapsulated CoFe <sub>2</sub> O <sub>4</sub> /graphene nanocomposite                                             | 100 mA g <sup>-1</sup>  | 1453.1/917                                                         | 63                       | 925.6                                      | 100          | [31]      |
| CoFe <sub>2</sub> O <sub>4</sub> yolk-shell microsphere                                                                  | 1000 mA g <sup>-1</sup> | 1158/902                                                           | 78                       | 751                                        | 200          | this work |

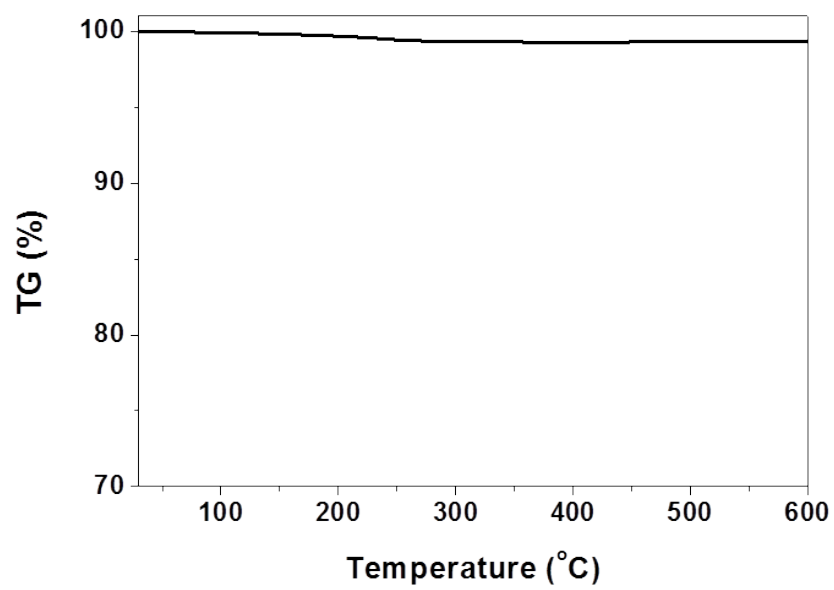

**Fig. S1** TG analysis of the yolk-shell  $\text{CoFe}_2\text{O}_4$  powders.

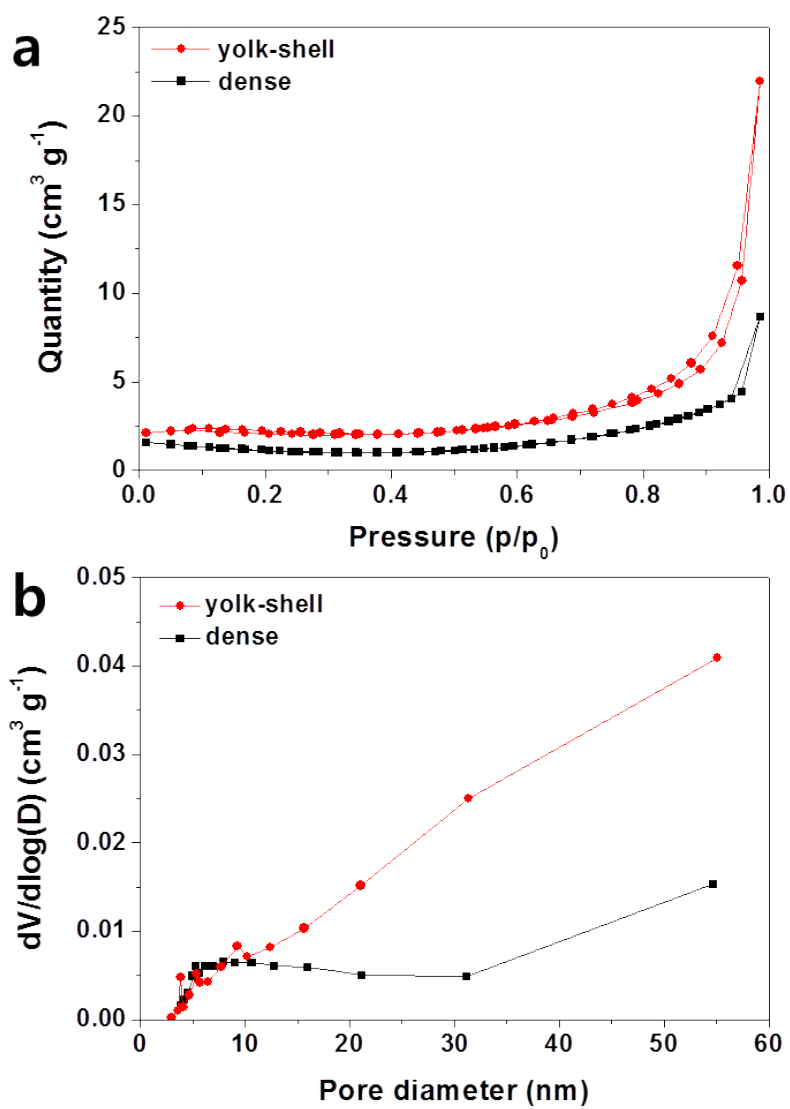

**Fig. S2** (a) Nitrogen adsorption-desorption isotherms and (b) pore size distributions of the yolk-shell and dense  $\text{CoFe}_2\text{O}_4$  powders.

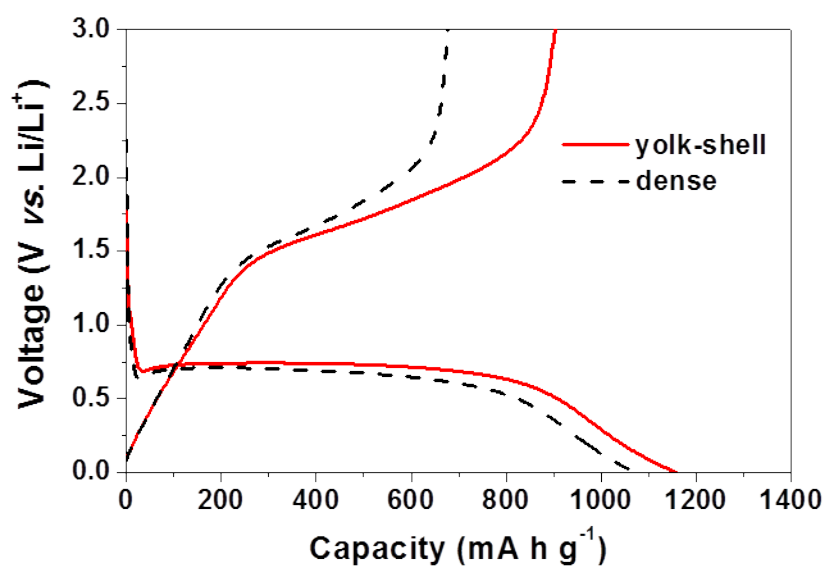

**Fig. S3** Initial charge and discharge curves of the yolk-shell and dense  $\text{CoFe}_2\text{O}_4$  powders at a constant current density of  $1 \text{ A g}^{-1}$ .
